# Supplementary material
Source: PubMed Central journal article supplement (PMC4298544)
Supplement: JCM.03087-14_zjm999094032so3.pdf [file JCM.03087-14_zjm999094032so3.pdf]

## SUPPLEMENTAL FIGURES

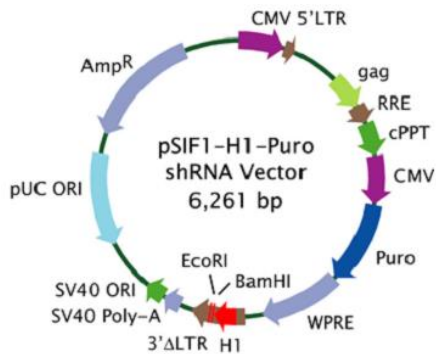

**Supplemental Figure 1: Plasmid map of pSIF1-H1-Puro shRNA vector (1).** The plasmid used for internal normalization to quantify 2-LTR circles per million cells in the plasmid DNA isolates.

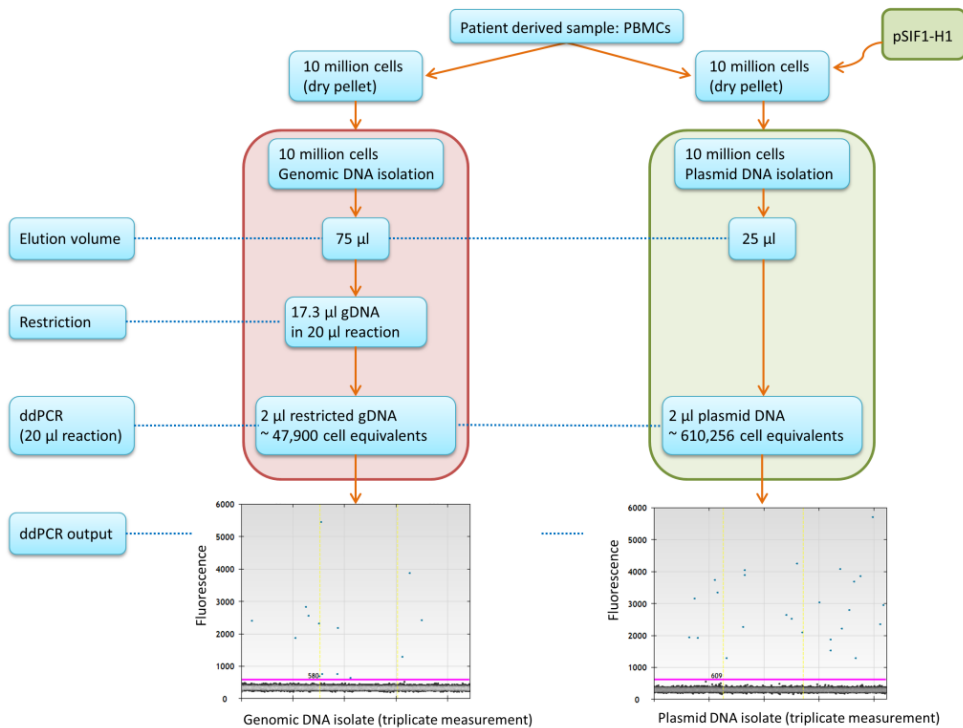

**Supplemental Figure 2: Workflow representation of both DNA isolation methods in patient derived samples with ddPCR outcome.** Genomic DNA isolation is shown with subsequent

restriction and an average number of cell equivalents loaded in ddPCR well. Plasmid DNA isolation method is illustrated with spiking of a known number of pSIF1-H1 plasmid copies for data normalization in 10 million cells and an average number of cell equivalents loaded in ddPCR well. The ddPCR fluorescence intensity plots of a triplicate measurement show more positive droplets for the plasmid DNA isolate compared to the genomic DNA isolate of the same patient derived sample.

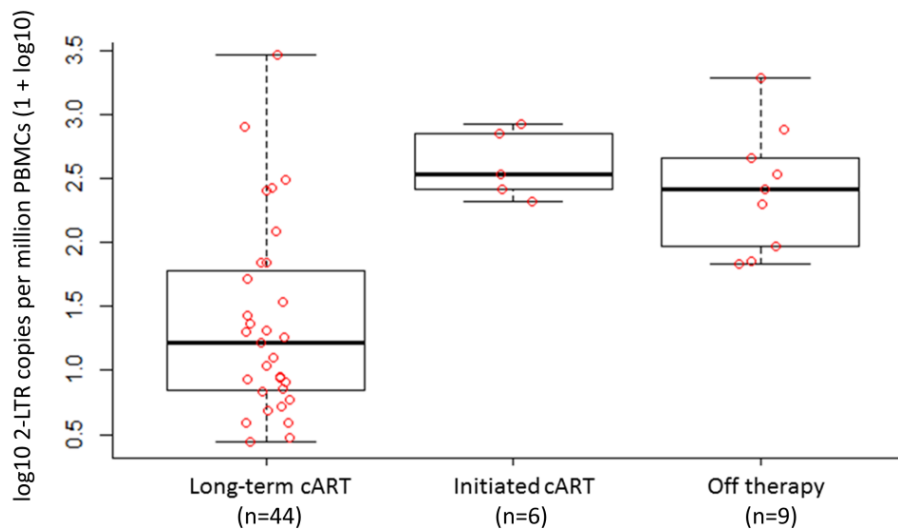

**Supplemental Figure 3: Comparison of 2-LTR copies per million PBMCs between the three patient groups in plasmid DNA isolates.** The highest number of 2-LTR copies per million PBMCs was measured in the group of patients with recently initiated cART and detectable VL.

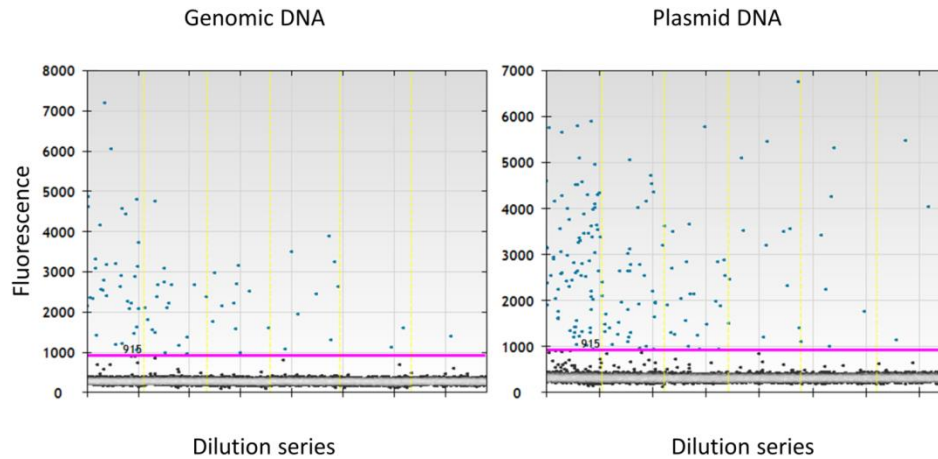

**Supplemental Figure 4: Fluorescence intensity plots of ddPCRs for 2-LTR quantification in the dilution series in both DNA isolation methods.** DdPCR droplets that either have no template (grey-black dots under the pink threshold line) or contain template (2-LTR) that resulted in a PCR amplification (blue dots above the pink threshold line) are shown. More positive droplets were detected in plasmid DNA isolates and a higher fluorescence amplitude of positive droplets observed compared to the genomic DNA isolates.

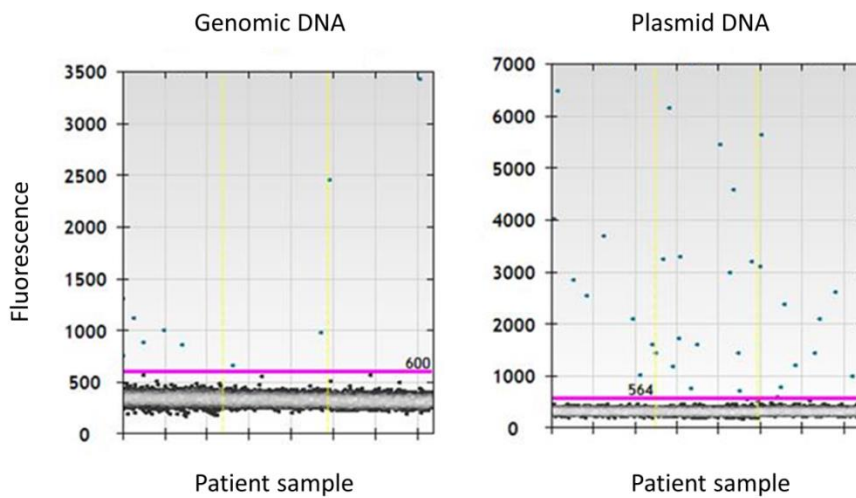

**Supplemental Figure 5: Fluorescence intensity plots of ddPCRs for 2-LTR quantification in a patient derived sample in both DNA isolation methods.** DdPCR droplets that either have no

template (grey-black dots under the pink line) or contain template that resulted in a PCR amplification (blue dots above the pink threshold line) are shown. The comparison of genomic versus plasmid DNA isolation on the triplicate measurement of a patient derived sample shows that the amount of positive droplets in the plasmid DNA isolates is substantially higher compared to the genomic DNA isolates. A significantly higher mean fluorescence intensity of the positive droplets was observed in plasmid DNA isolates.

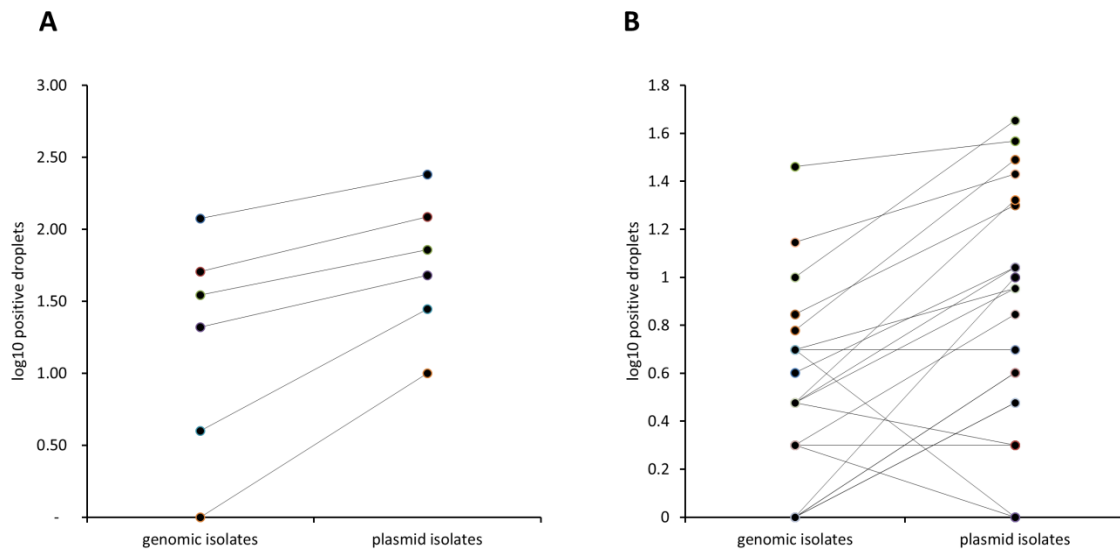

**Supplemental Figure 6: Comparison of the number of positive droplets in plasmid and genomic DNA isolates.** More positive droplets were detected in the plasmid DNA isolates compared to the genomic DNA isolates in the dilution series (A) as well as in the patient derived samples (B).

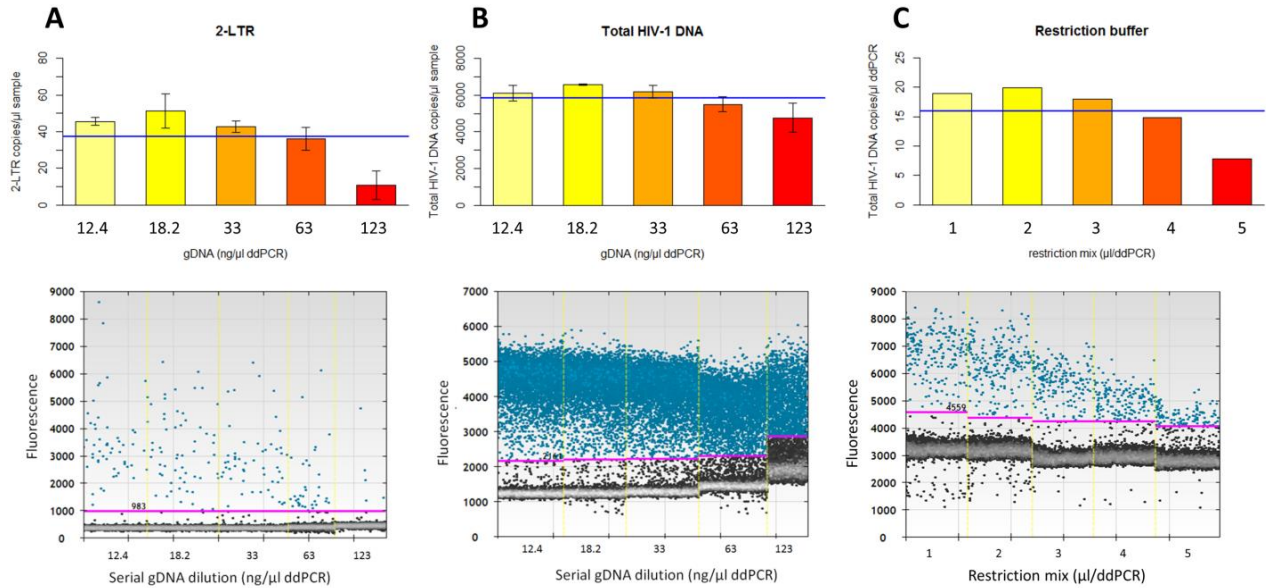

**Supplemental Figure 7: DdPCR inhibition.** A & B: Quantitative output of triplicate dilution series of gDNA spiked with an equal amount of HIV-1 infected DNA assessed by the 2-LTR assay (A) and total HIV-1 DNA assay (B) with the fluorescence intensity plots. C: Quantitative output and fluorescence intensity plot of the total HIV-1 DNA assay in reaction mixtures with variable restriction digestion buffer mix (1-5  $\mu$ l) showing ddPCR inhibition evident at concentrations above 2  $\mu$ l. The blue horizontal lines show the mean of all measures. Error bars indicate the standard deviation within the three measurements.

## References

1. **System Biosciences (SBI).** 2008. pSIF-H1 shRNA Cloning and Expression Lentivectors (Cat. #s SI100C-1, SI101B-1). User Manual SBI (ver. 4-080514).
